# Supplementary material
Source: MDPI journal article supplement (https://www.mdpi.com/2073-4352/8/12/456)
Supplement: s1 [file s1]

# Selective and Recyclable Sensing of aqueous phase 2,4,6-trinitrophenol (TNP) Based on Cd(II) Coordination Polymer with Zwitterionic Ligand

Kaimin Wang <sup>1</sup>, Huaijun Tang <sup>1,\*</sup>, Donghua Zhang <sup>1</sup>, Yulu Ma <sup>2,\*</sup> and Yuna Wang <sup>3</sup>

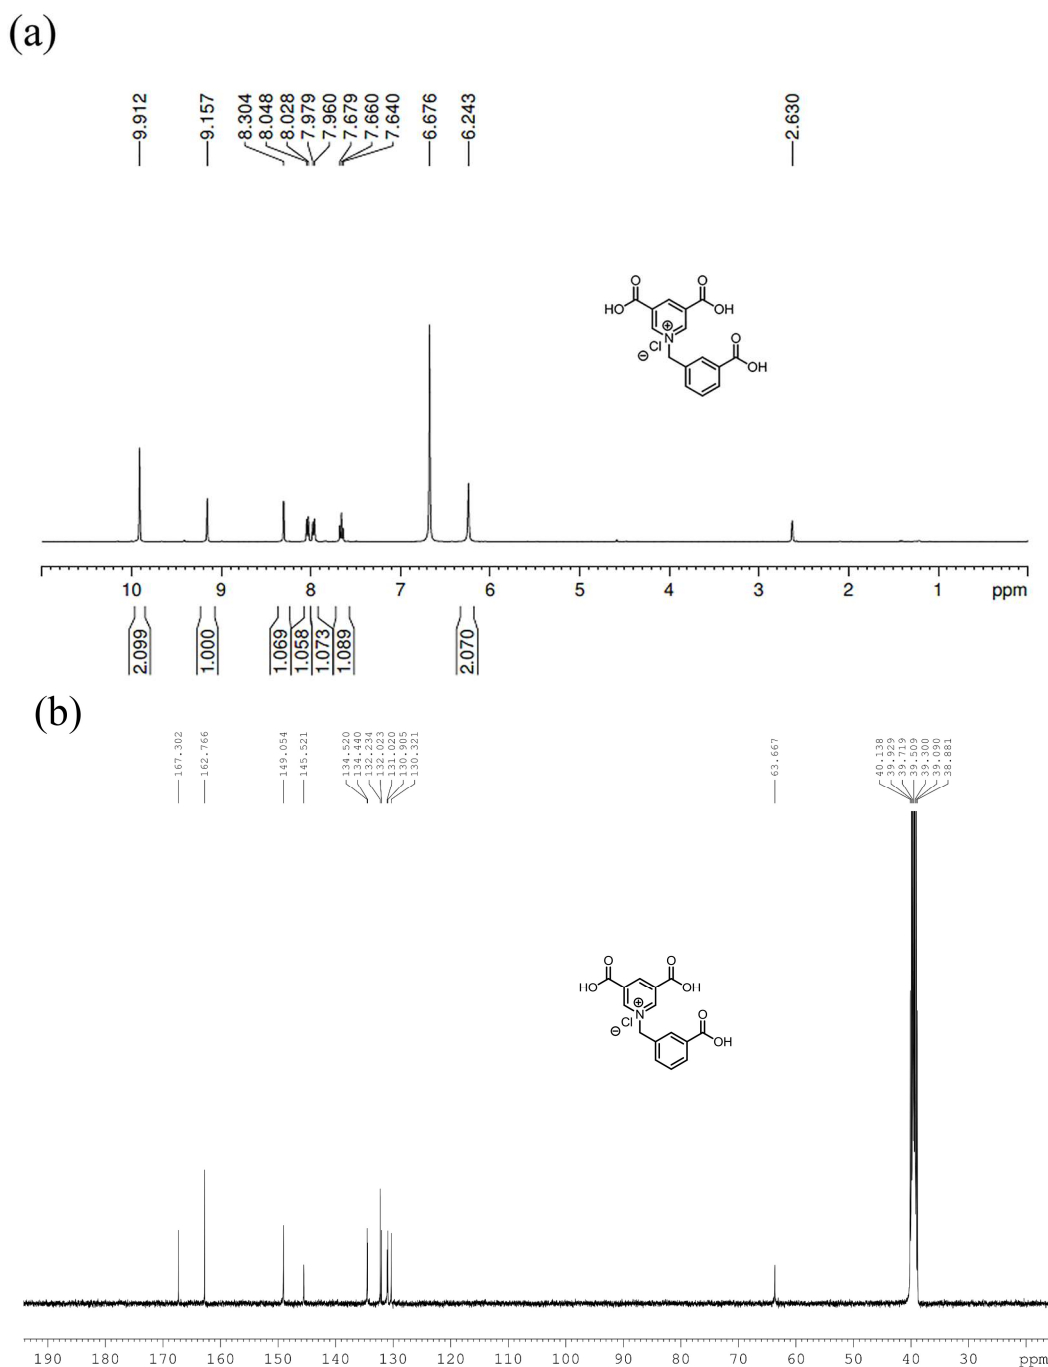

**Figure S1.** (a)  $^1\text{H}$  NMR (400 Hz,  $\text{DMSO-}d_6 + \text{DCl}$ ) spectra of the  $\text{H}_3\text{DccbpCl}$  ligand; (b)  $^{13}\text{C}$  NMR (100 Hz,  $\text{DMSO-}d_6 + \text{DCl}$ ) spectra of the  $\text{H}_3\text{DccbpCl}$  ligand.

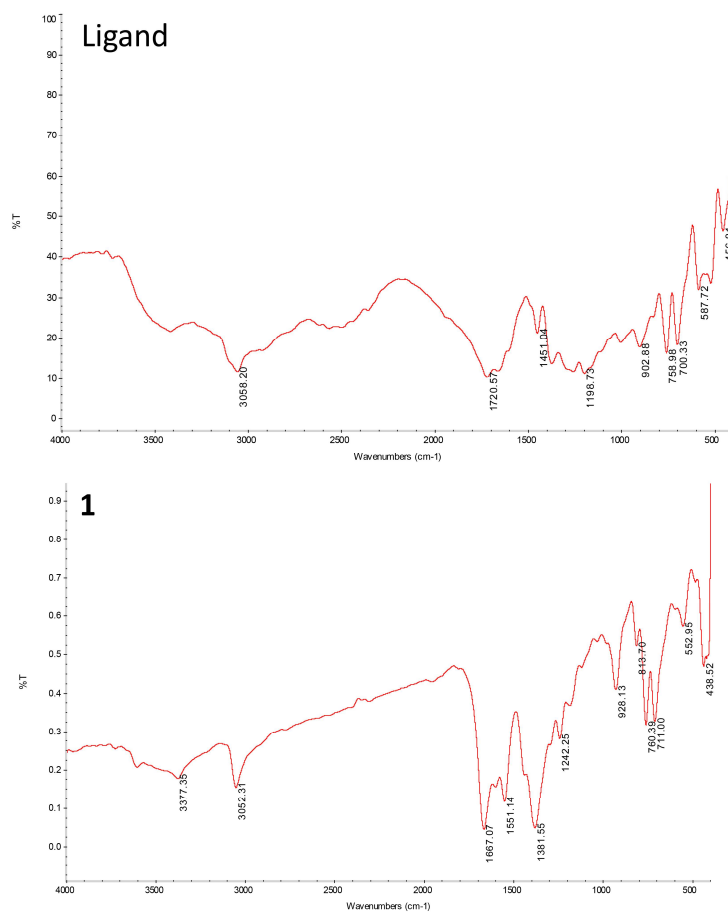

**Figure S2.** The infrared spectrum (IR) spectra of (a) H<sub>3</sub>DcbpCl ligand; (b) coordination polymer 1.

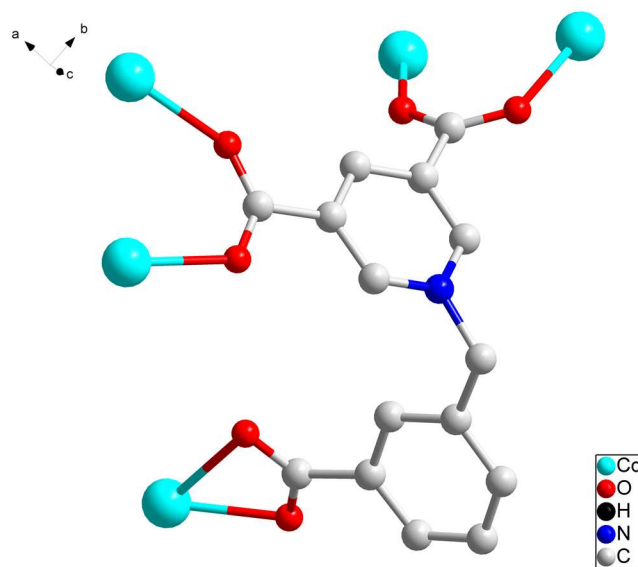

**Figure S3.** Coordination modes of ligand in the coordination polymer 1.

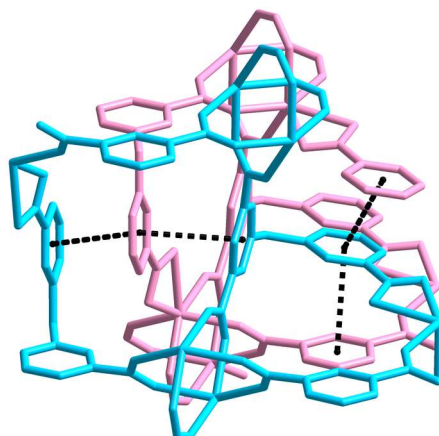

**Figure S4.** The interlayer  $\pi\cdots\pi$  stacking interactions in coordination polymers (CP) 1.

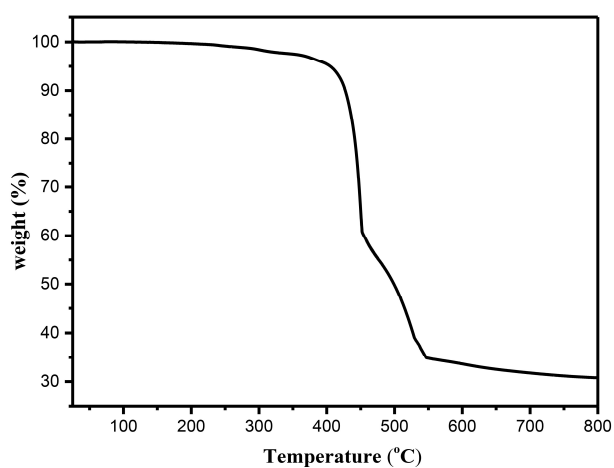

**Figure S5.** The thermogravimetric analysis (TGA) diagram of coordination polymer 1.

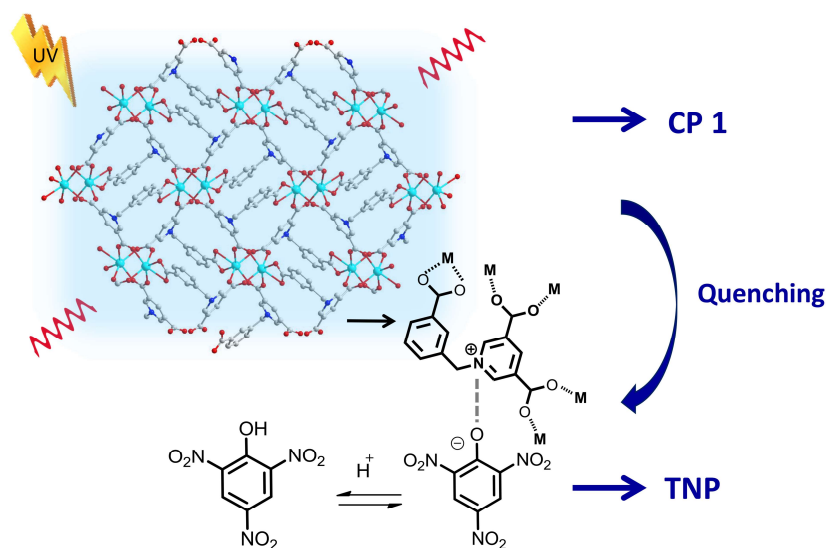

**Figure S6.** A possible schematic representation of the selective sensing and the simulation result of the electrostatic interaction between 2,4,6-trinitrophenol (TNP) and the monomer unit of coordination polymer 1.

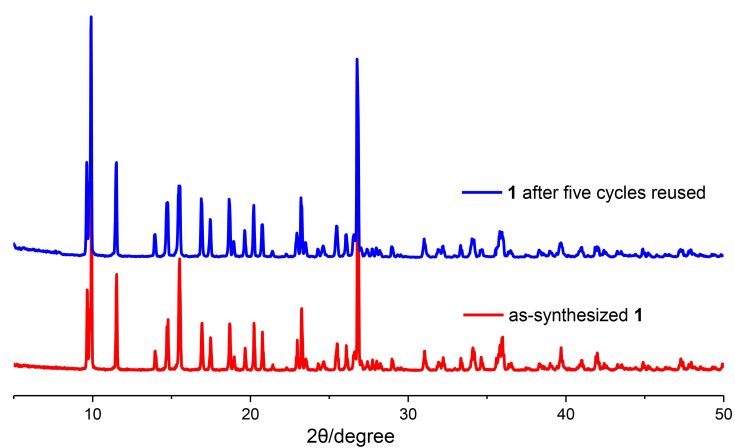

**Figure S7.** Powder X-ray diffraction (PXRD) patterns of coordination polymer **1** after detection of TNP (after five cycles reused).
